# Supplementary material for: Myosin-binding protein C regulates the sarcomere lattice and stabilizes the OFF states of myosin heads
Source: PubMed Central journal article supplement (PMC10960836; doi:10.1038/s41467-024-46957-7), 2024-03-23
Supplement: 41467_2024_46957_MOESM1_ESM.pdf [file 41467_2024_46957_MOESM1_ESM.pdf]

## Supplementary Information for

### **Myosin-binding protein C regulates the sarcomere lattice and stabilizes the OFF states of myosin heads**

Anthony L. Hessel<sup>1,2\*</sup>, Nichlas M. Engels<sup>3</sup>, Michel Kuehn<sup>1,2</sup>, Devin Nissen<sup>4</sup>, Rachel L. Sadler<sup>5</sup>, Weikang Ma<sup>4</sup>, Thomas C. Irving<sup>4</sup>, Wolfgang A. Linke<sup>1</sup>, Samantha P. Harris<sup>5\*</sup>

<sup>1</sup> Institute of Physiology II, University of Muenster; Muenster, Germany. <sup>2</sup> Accelerated Muscle Biotechnologies Consultants, Boston, MA, USA. <sup>3</sup> Department of Cellular and Molecular Medicine, University of Arizona; Tucson, AZ, USA. <sup>4</sup> BioCAT, Department of Biology, Illinois Institute of Technology; Chicago, IL, USA.

<sup>5</sup> Department of Physiology, University of Arizona, Tucson, AZ, USA.

\* Corresponding authors. E-mail: anthony.hessel@uni-muenster.de, samharris@arizona.edu

The PDF file includes:

Supplementary Figures 1-3

Supplementary Tables 1-12

## Supplementary Figure

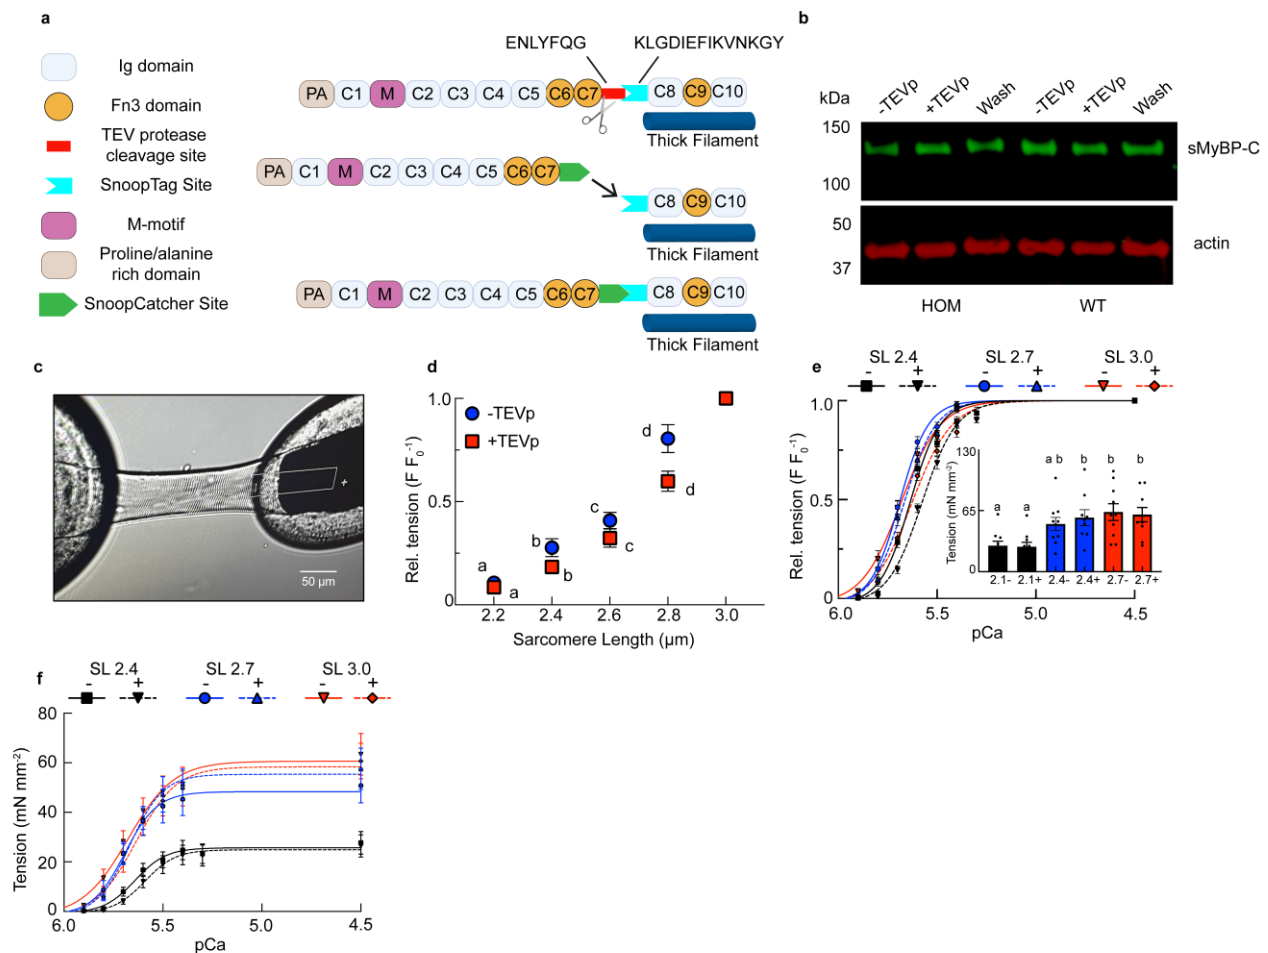

**Supplementary Figure 1. SNOOPC2 mouse line design and evaluation.** **a** SNOOPC2 mice express a modified fMyBP-C that contains a TEV protease recognition site (red rectangle) and a SnoopTag (cyan trapezoid). The addition of TEV protease cleaves the endogenous C1-C7 domains of fMyBP-C while SnoopTag-C8-C10 remains anchored to the thick filament. Although not employed in this study, it is possible to incubate with a recombinant fMyBP-C construct containing the SnoopCatcher tag (green trapezoid), which will lead to *in situ* replacement of the cleaved fMyBP-C with the recombinant fragment. **b** Western blot of slow MyBP-C paralog from homozygous and wildtype SNOOPC2 psoas, before and after TEV protease treatment. As expected, no cleavage was detected in the slow MyBP-C paralog. This experiment was repeated with similar results three times, two are shown. **c** Representative image of a muscle fiber attachment for a mechanics experiment. The muscle fiber was glued between a motor and force transducer using 100% pure silicone rubber. **d** Passive tension-sarcomere length before (-) and after (+) TEVp treatment, with passive tension normalized to maximal tension at SL 3.0. **e** Tension-pCa relationship at SL 2.4, 2.7, and 3.0 before (-) and after (+) TEVp treatment, with every condition scaled to its maximum (pCa 4.5) tension. **f** Absolute tension-pCa relationship at SL 2.4, 2.7, and 3.0 before (-) and after (+) TEVp treatment. Statistics throughout are repeated-measures ANOVA designs followed by a Tukey Honestly Significant Difference (HSD) post-hoc test on significant main effects. Statistical differences are reported via connecting letters, where conditions assigned to different letters are significantly different. Data throughout reported as mean  $\pm$  SE. The dataset was generated from  $n=49$  fibers prepared from  $N=10$  mice (6 female / 4 male). Further statistical details are in Supplementary Tables 2, 3, 5-8.

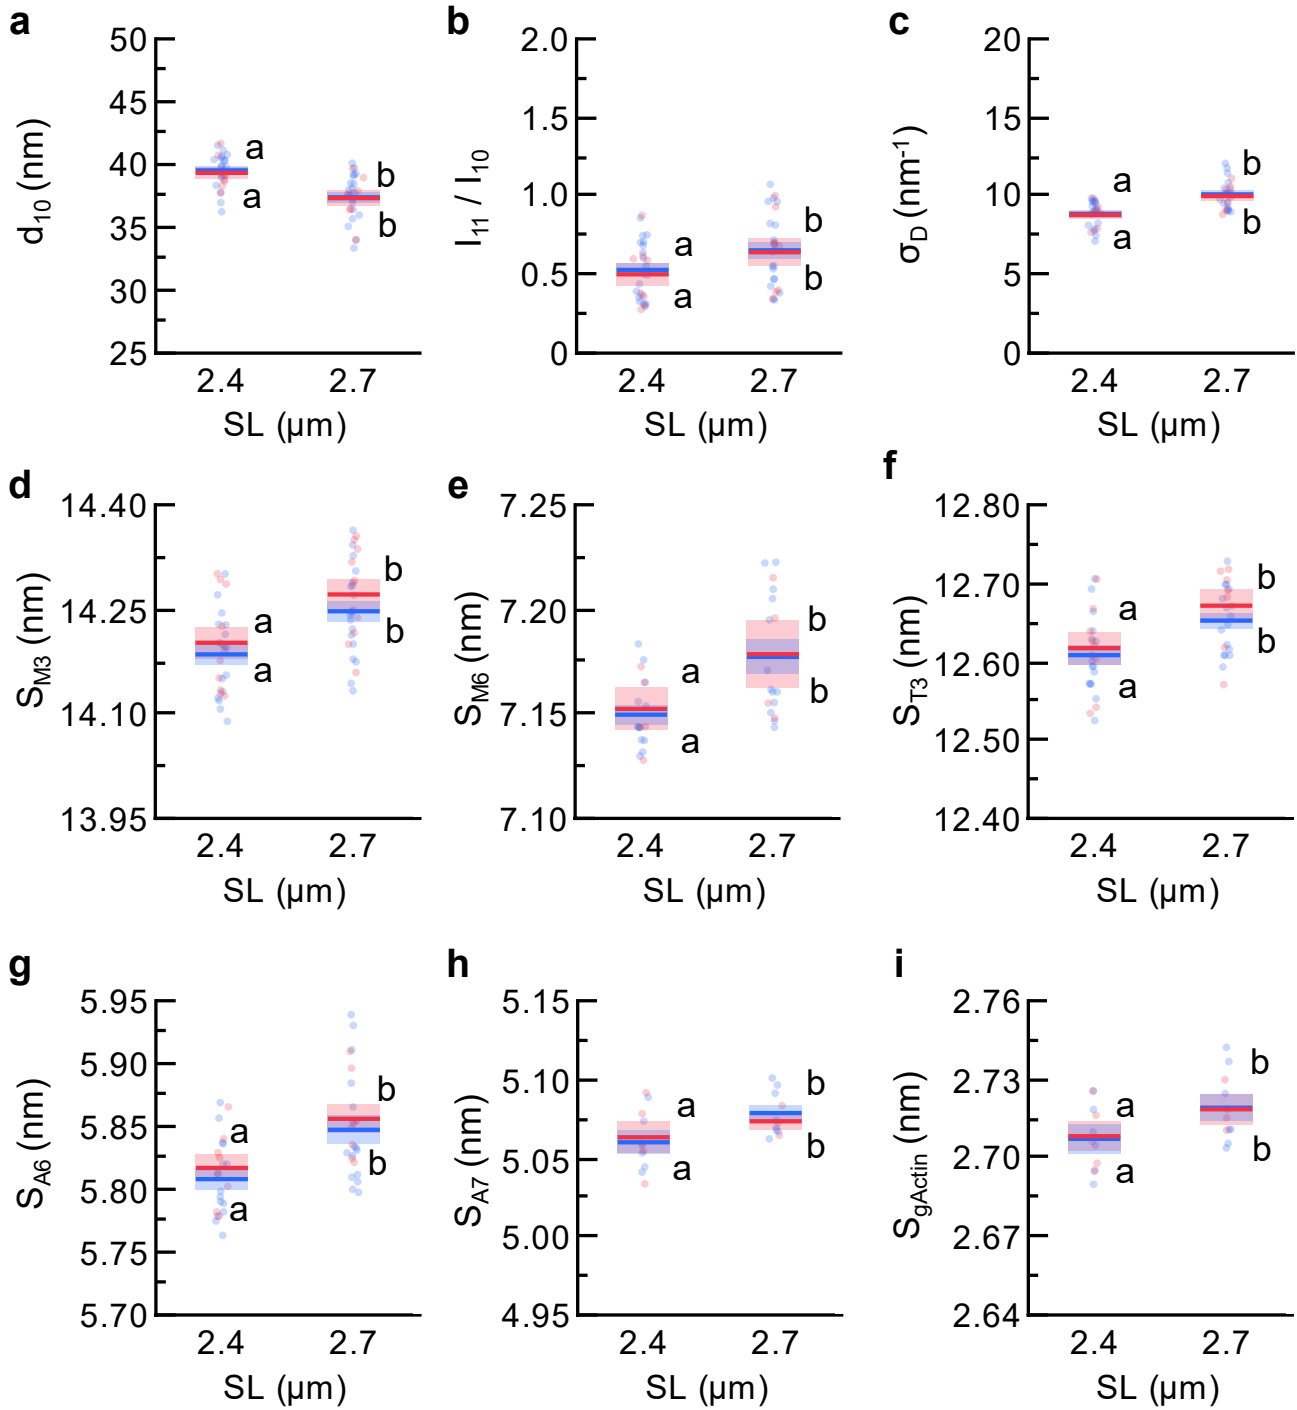

Supplementary Figure 2. **Control dataset for small-angle X-ray diffraction experiments.** **a-i** X-ray diffraction patterns were collected from wildtype SNOOPC2 psoas fibers under passive conditions at two difference sarcomere lengths (SL), before (blue) and after (red) TEV protease treatment. X-ray features are shown for  $d_{10}$  (**a**),  $I_{11}/I_{10}$  (**b**),  $\sigma_d$  (**c**),  $S_{M3}$  (**d**),  $S_{M6}$  (**e**),  $S_{T3}$  (**f**),  $S_{A6}$  (**g**),  $S_{A7}$  (**h**), and  $S_{gActin}$  (**i**). As expected, we detected no changes in structural features in wildtype muscles caused by TEV protease treatment. Statistics throughout are ANOVA designs with main effects treatment, SL, and their interaction, and a random effect of individual, followed by a Tukey Honestly Significant Difference (HSD) post-hoc test on significant main effects ( $P < 0.05$ ), and reported in figures as connecting letters: conditions assigned different letters are significantly different. Data throughout reported as mean  $\pm$  SE. Dataset generated from  $n=20$  fiber bundles prepared from  $N=6$  mice (3 male / 3 female). Full descriptive and statistical details are in Supplementary Table 7.

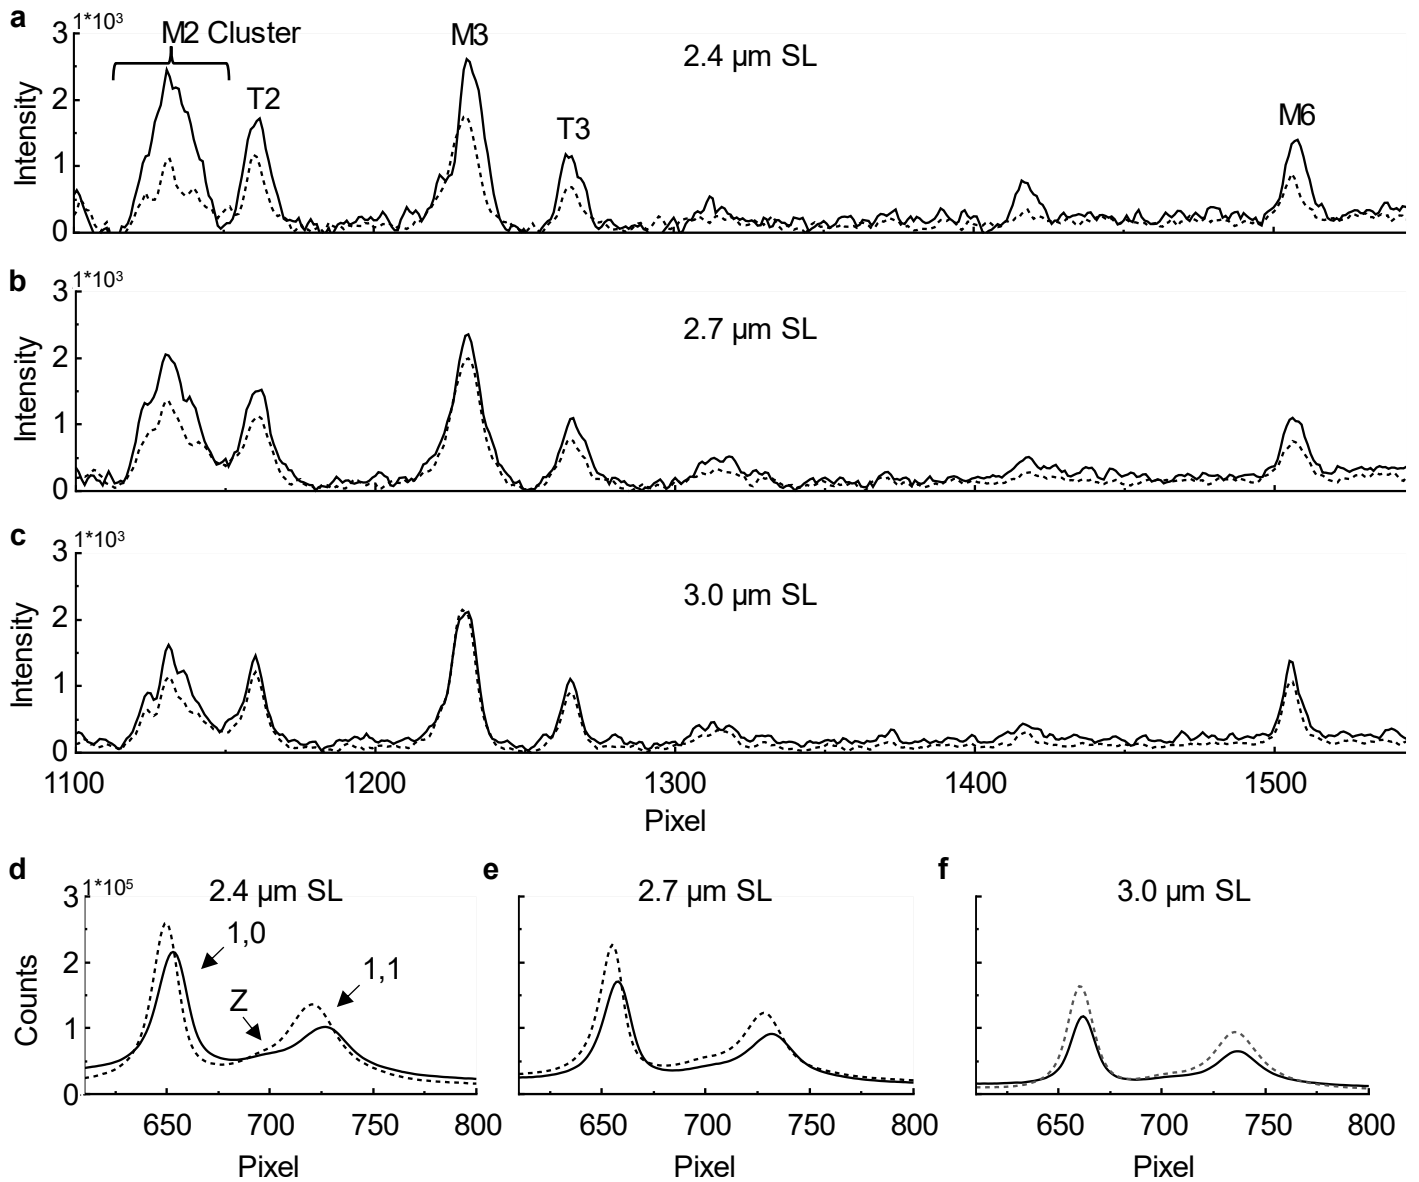

Supplementary Figure 3. **Exemplar 1D intensity profiles of diffraction patterns.** Representative 1D intensity profiles from the meridional (a-c) and equatorial (d-f) axes, for each sarcomere length (SL), before (solid lines) and after (dashed lines) TEV protease cleavage.

## Supplementary Tables

Supplementary Table 1. **Statistical details from experiments shown in Fig. 1g-i. N = number of preparations included in the condition. For SL 2.4, a total of 10 trials were run from psoas collected from 4 mice (2 female / 2 male). For SL 2.7, a total of 10 (9 post) trials were run from psoas collected from 6 mice (4 female / 2 male). For SL 3.0, a total of 10 trial were run from psoas collected from 4 mice (3 female / 1 male).**

| Parameter | SL ( $\mu\text{m}$ ) | Treatment | pCa       | N  | mean  | SE    | ANOVA       | df 1 | df 2 | F stat | Prob > F                                |
|-----------|----------------------|-----------|-----------|----|-------|-------|-------------|------|------|--------|-----------------------------------------|
| pCa50     | 2.4                  | Pre       | 4.5-9.0   | 10 | 5.61  | 0.012 | SL          | 2    | 52   | 25.33  | <b><math>2.09 \times 10^{-8}</math></b> |
|           | 2.4                  | Post      | 4.5-9.0   | 10 | 5.55  | 0.011 |             |      |      |        |                                         |
| pCa50     | 2.7                  | Pre       | 4.5 - 9.0 | 10 | 5.696 | 0.011 | Treatment   | 1    | 52   | 23.00  | <b><math>1.4 \times 10^{-5}</math></b>  |
|           | 2.7                  | Post      | 4.5 - 9.0 | 9  | 5.668 | 0.009 |             |      |      |        |                                         |
| pCa50     | 3.0                  | Pre       | 4.5 - 9.0 | 10 | 5.683 | 0.012 | Interaction | 2    | 52   | 0.98   | 0.38                                    |
|           | 3.0                  | Post      | 4.5 - 9.0 | 10 | 5.627 | 0.011 |             |      |      |        |                                         |

Bold values indicate significant effect. SE = standard error of the mean

Supplementary Table 2. Statistical details from experiments shown in **Fig. 1g-h** and **Supplementary Fig. 1e**. N = number of preparations included in the condition. For SL 2.4, a total of 10 trials were run from psoas collected from 4 mice (2 female / 2 male). For SL 2.7, a total of 10 (9 post) trials were run from psoas collected from 6 mice (4 female / 2 male).

| Parameter                          | SL ( $\mu\text{m}$ )               | Treatment | pCa | N     | mean  | SE    |
|------------------------------------|------------------------------------|-----------|-----|-------|-------|-------|
| Tension<br>( $\text{mN mm}^{-2}$ ) | 2.4                                | Pre       | 4.5 | 10    | 1     | 0     |
|                                    | 2.4                                | Pre       | 5.3 | 9     | 0.938 | 0.03  |
|                                    | 2.4                                | Pre       | 5.4 | 10    | 0.971 | 0.024 |
|                                    | 2.4                                | Pre       | 5.5 | 10    | 0.786 | 0.021 |
|                                    | 2.4                                | Pre       | 5.6 | 10    | 0.659 | 0.03  |
|                                    | 2.4                                | Pre       | 5.7 | 10    | 0.284 | 0.028 |
|                                    | 2.4                                | Pre       | 5.8 | 9     | 0.026 | 0.01  |
|                                    | 2.4                                | Pre       | 5.9 | 9     | 0.008 | 0.004 |
|                                    | 2.4                                | Pre       | 9.0 | 10    | 0     | 0     |
|                                    | 2.4                                | Post      | 4.5 | 10    | 1     | 0     |
|                                    | 2.4                                | Post      | 5.3 | 9     | 0.903 | 0.015 |
|                                    | 2.4                                | Post      | 5.4 | 10    | 0.881 | 0.02  |
|                                    | 2.4                                | Post      | 5.5 | 10    | 0.685 | 0.032 |
|                                    | 2.4                                | Post      | 5.6 | 10    | 0.456 | 0.022 |
|                                    | 2.4                                | Post      | 5.7 | 10    | 0.145 | 0.02  |
|                                    | 2.4                                | Post      | 5.8 | 9     | 0.01  | 0.004 |
|                                    | 2.4                                | Post      | 5.9 | 9     | 0.002 | 0.001 |
|                                    | Tension<br>( $\text{mN mm}^{-2}$ ) | 2.7       | Pre | 4.5   | 10    | 1     |
| 2.7                                |                                    | Pre       | 5.4 | 10    | 0.979 | 0.017 |
| 2.7                                |                                    | Pre       | 5.5 | 10    | 0.869 | 0.022 |
| 2.7                                |                                    | Pre       | 5.6 | 10    | 0.791 | 0.027 |
| 2.7                                |                                    | Pre       | 5.7 | 10    | 0.461 | 0.034 |
| 2.7                                |                                    | Pre       | 5.8 | 10    | 0.15  | 0.042 |
| 2.7                                |                                    | Pre       | 5.9 | 10    | 0.005 | 0.005 |
| 2.7                                |                                    | Pre       | 9.0 | 10    | 0     | 0     |
| 2.7                                |                                    | Post      | 4.5 | 9     | 1     | 0     |
| 2.7                                |                                    | Post      | 5.4 | 9     | 0.963 | 0.024 |
| 2.7                                |                                    | Post      | 5.5 | 9     | 0.835 | 0.015 |
| 2.7                                |                                    | Post      | 5.6 | 9     | 0.701 | 0.021 |
| 2.7                                | Post                               | 5.7       | 9   | 0.41  | 0.042 |       |
| 2.7                                | Post                               | 5.8       | 9   | 0.097 | 0.024 |       |
| 2.7                                | Post                               | 5.9       | 9   | 0.004 | 0.003 |       |
| 2.7                                | Post                               | 9.0       | 9   | 0     | 0     |       |

SE = standard error of the mean

Supplementary Table 3. **Statistical details from experiments shown in Fig. 1i and Supplementary Fig. 1e. N = number of preparations included in the condition. For SL 3.0, a total of 10 trial were run from psoas collected from 4 mice (3 female / 1 male).**

| Parameter                          | SL ( $\mu\text{m}$ ) | Treatment | pCa | N  | mean  | SE    |
|------------------------------------|----------------------|-----------|-----|----|-------|-------|
| Tension<br>( $\text{mN mm}^{-2}$ ) | 3.0                  | Pre       | 4.5 | 10 | 1     | 0     |
|                                    | 3.0                  | Pre       | 5.4 | 10 | 0.896 | 0.023 |
|                                    | 3.0                  | Pre       | 5.5 | 10 | 0.813 | 0.027 |
|                                    | 3.0                  | Pre       | 5.6 | 10 | 0.729 | 0.028 |
|                                    | 3.0                  | Pre       | 5.7 | 10 | 0.459 | 0.034 |
|                                    | 3.0                  | Pre       | 5.8 | 10 | 0.2   | 0.041 |
|                                    | 3.0                  | Pre       | 5.9 | 10 | 0.037 | 0.007 |
|                                    | 3.0                  | Pre       | 9.0 | 10 | 0     | 0     |
|                                    | 3.0                  | Post      | 4.5 | 10 | 1     | 0     |
|                                    | 3.0                  | Post      | 5.4 | 10 | 0.841 | 0.026 |
|                                    | 3.0                  | Post      | 5.5 | 10 | 0.745 | 0.024 |
|                                    | 3.0                  | Post      | 5.6 | 10 | 0.62  | 0.024 |
|                                    | 3.0                  | Post      | 5.7 | 10 | 0.305 | 0.031 |
|                                    | 3.0                  | Post      | 5.8 | 10 | 0.082 | 0.02  |
|                                    | 3.0                  | Post      | 5.9 | 10 | 0.012 | 0.002 |
|                                    | 3.0                  | Post      | 9.0 | 10 | 0     | 0     |

Supplementary Table 4. **Statistical details from experiments shown in Fig. 1k-m.** N = number of preparations included in the condition. For SL 2.4, a total of 10 trials were run from psoas collected from 4 mice (2 female / 2 male). For SL 2.7, a total of 10 trials were run from psoas collected from 6 mice (4 female / 2 male). For SL 3.0, a total of 10 trials were run from psoas collected from 4 mice (3 female / 1 male).

| Parameter | SL ( $\mu\text{m}$ ) | Treatment | pCa | N         | mean  | SE    | ANOVA       | df 1 | df 2 | F stat | Prob > F                     |
|-----------|----------------------|-----------|-----|-----------|-------|-------|-------------|------|------|--------|------------------------------|
| $K_{tr}$  | 2.4                  | Pre       | 4.5 | 10        | 1     | 0     | Treatment   | 1    | 79   | 52.67  | <b>2.39x10<sup>-10</sup></b> |
|           | 2.4                  | Pre       | 5.3 | 9         | 0.926 | 0.043 |             |      |      |        |                              |
|           | 2.4                  | Pre       | 5.4 | 10        | 0.874 | 0.034 | pCa         | 4    | 79   | 38.03  | <b>1.01x10<sup>-17</sup></b> |
|           | 2.4                  | Pre       | 5.5 | 10        | 0.78  | 0.037 |             |      |      |        |                              |
|           | 2.4                  | Pre       | 5.6 | 10        | 0.732 | 0.044 | Interaction | 4    | 79   | 3.36   | <b>0.014</b>                 |
|           | 2.4                  | Pre       | 5.7 | 10        | 0.516 | 0.049 |             |      |      |        |                              |
|           | 2.4                  | Post      | 4.5 | 10        | 1     | 0     |             |      |      |        |                              |
|           | 2.4                  | Post      | 5.3 | 9         | 1.028 | 0.024 |             |      |      |        |                              |
|           | 2.4                  | Post      | 5.4 | 10        | 0.986 | 0.026 |             |      |      |        |                              |
|           | 2.4                  | Post      | 5.5 | 10        | 1.025 | 0.051 |             |      |      |        |                              |
|           | 2.4                  | Post      | 5.6 | 10        | 1.007 | 0.059 |             |      |      |        |                              |
|           | 2.4                  | Post      | 5.7 | 10        | 0.602 | 0.054 |             |      |      |        |                              |
| $K_{tr}$  | 2.7                  | Pre       | 4.5 | 10        | 1     | 0     | Treatment   | 1    | 77   | 39.84  | <b>1.6x10<sup>-8</sup></b>   |
|           | 2.7                  | Pre       | 5.4 | 10        | 0.913 | 0.024 |             |      |      |        |                              |
|           | 2.7                  | Pre       | 5.5 | 10        | 0.898 | 0.024 | pCa         | 4    | 75   | 122.53 | <b>4.2x10<sup>-32</sup></b>  |
|           | 2.7                  | Pre       | 5.6 | <b>10</b> | 0.882 | 0.045 |             |      |      |        |                              |
|           | 2.7                  | Pre       | 5.7 | 9         | 0.669 | 0.045 | Interaction | 4    | 75   | 1.56   | 0.19                         |
|           | 2.7                  | Pre       | 5.8 | 10        | 0.317 | 0.03  |             |      |      |        |                              |
|           | 2.7                  | Post      | 4.5 | 10        | 1     | 0     |             |      |      |        |                              |
|           | 2.7                  | Post      | 5.4 | 9         | 1.034 | 0.026 |             |      |      |        |                              |
|           | 2.7                  | Post      | 5.5 | 9         | 1.043 | 0.037 |             |      |      |        |                              |
|           | 2.7                  | Post      | 5.6 | 9         | 1.065 | 0.044 |             |      |      |        |                              |
| $K_{tr}$  | 2.7                  | Post      | 5.7 | 9         | 0.811 | 0.056 |             |      |      |        |                              |
|           | 2.7                  | Post      | 5.8 | 9         | 0.366 | 0.03  |             |      |      |        |                              |
|           | 3.0                  | Pre       | 4.5 | 10        | 1     | 0     | Treatment   | 1    | 76   | 1.14   | 0.29                         |
|           | 3.0                  | Pre       | 5.4 | 10        | 0.907 | 0.03  |             |      |      |        |                              |
|           | 3.0                  | Pre       | 5.5 | 10        | 0.891 | 0.03  | pCa         | 4    | 76   | 57.84  | <b>2.2x10<sup>-22</sup></b>  |
|           | 3.0                  | Pre       | 5.6 | 10        | 0.843 | 0.036 |             |      |      |        |                              |
|           | 3.0                  | Pre       | 5.7 | 10        | 0.683 | 0.03  | Interaction | 4    | 76   | 1.22   | 0.31                         |
|           | 3.0                  | Pre       | 5.8 | 9         | 0.39  | 0.031 |             |      |      |        |                              |
|           | 3.0                  | Post      | 4.5 | 10        | 1     | 0     |             |      |      |        |                              |
|           | 3.0                  | Post      | 5.4 | 10        | 0.955 | 0.038 |             |      |      |        |                              |
| 3.0       | Post                 | 5.5       | 10  | 0.945     | 0.051 |       |             |      |      |        |                              |
| 3.0       | Post                 | 5.6       | 10  | 0.936     | 0.048 |       |             |      |      |        |                              |
| 3.0       | Post                 | 5.7       | 10  | 0.64      | 0.06  |       |             |      |      |        |                              |
| 3.0       | Post                 | 5.8       | 6   | 0.351     | 0.056 |       |             |      |      |        |                              |

Bold values indicate significant effect. SE = standard error of the mean. T-tests are one sided.



Supplementary Table 5. **Statistical details from experiments shown in Supplementary Fig. 1f.** N = number of preparations included in the condition. For SL 2.4, a total of 10 trials were run from psoas collected from 4 mice (2 female / 2 male). For SL 2.7, a total of 10 (9 post) trials were run from psoas collected from 6 mice (4 female / 2 male).

| Parameter                          | SL ( $\mu\text{m}$ )               | Treatment | pCa | N     | mean   | SE     |       |
|------------------------------------|------------------------------------|-----------|-----|-------|--------|--------|-------|
| Tension<br>( $\text{mN mm}^{-2}$ ) | 2.4                                | Pre       | 4.5 | 10    | 27.691 | 4.542  |       |
|                                    | 2.4                                | Pre       | 5.3 | 9     | 23.306 | 3.956  |       |
|                                    | 2.4                                | Pre       | 5.4 | 10    | 24.791 | 3.919  |       |
|                                    | 2.4                                | Pre       | 5.5 | 10    | 20.847 | 3.182  |       |
|                                    | 2.4                                | Pre       | 5.6 | 10    | 16.786 | 2.656  |       |
|                                    | 2.4                                | Pre       | 5.7 | 10    | 7.999  | 1.827  |       |
|                                    | 2.4                                | Pre       | 5.8 | 9     | 1.137  | 0.566  |       |
|                                    | 2.4                                | Pre       | 5.9 | 9     | 0.307  | 0.224  |       |
|                                    | 2.4                                | Pre       | 9   | 10    | 0      | 0      |       |
|                                    | 2.4                                | Post      | 4.5 | 10    | 26.463 | 4.498  |       |
|                                    | 2.4                                | Post      | 5.3 | 9     | 22.562 | 4.229  |       |
|                                    | 2.4                                | Post      | 5.4 | 10    | 22.735 | 3.957  |       |
|                                    | 2.4                                | Post      | 5.5 | 10    | 18.875 | 3.653  |       |
|                                    | 2.4                                | Post      | 5.6 | 10    | 12.086 | 2.544  |       |
|                                    | 2.4                                | Post      | 5.7 | 10    | 4.007  | 1.115  |       |
|                                    | 2.4                                | Post      | 5.8 | 9     | 0.429  | 0.232  |       |
|                                    | 2.4                                | Post      | 5.9 | 9     | 0.063  | 0.043  |       |
|                                    | 2.4                                | Post      | 9   | 10    | 0      | 0      |       |
|                                    | Tension<br>( $\text{mN mm}^{-2}$ ) | 2.7       | Pre | 4.5   | 10     | 50.745 | 6.935 |
|                                    |                                    | 2.7       | Pre | 5.4   | 10     | 45.267 | 6.637 |
| 2.7                                |                                    | Pre       | 5.5 | 10    | 42.513 | 6.8    |       |
| 2.7                                |                                    | Pre       | 5.6 | 10    | 36.495 | 5.897  |       |
| 2.7                                |                                    | Pre       | 5.7 | 10    | 23.522 | 4.638  |       |
| 2.7                                |                                    | Pre       | 5.8 | 10    | 8.696  | 3.803  |       |
| 2.7                                |                                    | Pre       | 5.9 | 10    | 0.479  | 0.403  |       |
| 2.7                                |                                    | Pre       | 9   | 10    | 0      | 0      |       |
| 2.7                                |                                    | Post      | 4.5 | 9     | 57.541 | 8.391  |       |
| 2.7                                |                                    | Post      | 5.4 | 9     | 51.427 | 6.015  |       |
| 2.7                                |                                    | Post      | 5.5 | 9     | 47.222 | 7.157  |       |
| 2.7                                |                                    | Post      | 5.6 | 9     | 37.691 | 4.601  |       |
| 2.7                                |                                    | Post      | 5.7 | 9     | 23.491 | 3.812  |       |
| 2.7                                | Post                               | 5.8       | 9   | 5.616 | 1.366  |        |       |
| 2.7                                | Post                               | 5.9       | 9   | 0.284 | 0.184  |        |       |
| 2.7                                | Post                               | 9         | 9   | 0     | 0      |        |       |

SE = standard error of the mean

Supplementary Table 6. **Statistical details from experiments shown in Supplementary Fig. 1f. N = number of preparations included in the condition. For SL 3.0, a total of 10 trials were run from psoas collected from 4 mice (3 female / 1 male).**

| Parameter                          | SL ( $\mu\text{m}$ ) | Treatment | pCa | N  | mean   | SE    |
|------------------------------------|----------------------|-----------|-----|----|--------|-------|
| Tension<br>( $\text{mN mm}^{-2}$ ) | 3.0                  | Pre       | 4.5 | 10 | 63.43  | 8.398 |
|                                    | 3.0                  | Pre       | 5.4 | 10 | 51.526 | 6.728 |
|                                    | 3.0                  | Pre       | 5.5 | 10 | 48.379 | 6.282 |
|                                    | 3.0                  | Pre       | 5.6 | 10 | 40.702 | 5.153 |
|                                    | 3.0                  | Pre       | 5.7 | 10 | 28.243 | 4.369 |
|                                    | 3.0                  | Pre       | 5.8 | 10 | 13.543 | 3.484 |
|                                    | 3.0                  | Pre       | 5.9 | 10 | 2.449  | 0.554 |
|                                    | 3.0                  | Pre       | 9   | 10 | 0      | 0     |
|                                    | 3.0                  | Post      | 4.5 | 10 | 60.728 | 7.196 |
|                                    | 3.0                  | Post      | 5.4 | 10 | 49.661 | 7.013 |
|                                    | 3.0                  | Post      | 5.5 | 10 | 44.657 | 6.068 |
|                                    | 3.0                  | Post      | 5.6 | 10 | 36.164 | 5.185 |
|                                    | 3.0                  | Post      | 5.7 | 10 | 19.582 | 3.733 |
|                                    | 3.0                  | Post      | 5.8 | 10 | 5.951  | 1.65  |
|                                    | 3.0                  | Post      | 5.9 | 10 | 0.757  | 0.152 |
|                                    | 3.0                  | Post      | 9   | 10 | 0      | 0     |

SE = standard error of the mean

Supplementary Table 7. **Statistical details from experiments shown in Figure 1f and Supplementary Figure 1d. N = number of preparations included in the condition. A total of 9 trials were run from psoas collected from 2 mice for the pre condition (1 female, 1 male). A total of 10 trials were run from psoas collected from 3 mice for the post condition (1 female / 2 male).**

| Parameter                                  | SL ( $\mu\text{m}$ ) | Treatment | pCa | N  | mean   | SE    | ANOVA       | df 1 | df 2 | F stat | Prob > F                                |
|--------------------------------------------|----------------------|-----------|-----|----|--------|-------|-------------|------|------|--------|-----------------------------------------|
| Passive Tension<br>( $\text{mN mm}^{-2}$ ) | 2.2                  | Pre       | 9   | 9  | 0.921  | 0.063 | SL          | 4    | 68   | 316.98 | <b><math>3.6 \times 10^{-43}</math></b> |
|                                            | 2.4                  | Pre       | 9   | 9  | 2.383  | 0.281 |             |      |      |        |                                         |
|                                            | 2.6                  | Pre       | 9   | 9  | 3.75   | 0.339 | Treatment   | 1    | 17   | 0.31   | 0.59                                    |
|                                            | 2.8                  | Pre       | 9   | 9  | 7.717  | 1.04  |             |      |      |        |                                         |
|                                            | 3.0                  | Pre       | 9   | 9  | 10.274 | 1.695 | Interaction | 4    | 68   | 1.68   | 0.17                                    |
|                                            | 2.2                  | Post      | 9   | 10 | 0.874  | 0.083 |             |      |      |        |                                         |
|                                            | 2.4                  | Post      | 9   | 10 | 1.822  | 0.178 |             |      |      |        |                                         |
|                                            | 2.6                  | Post      | 9   | 10 | 3.389  | 0.344 |             |      |      |        |                                         |
|                                            | 2.8                  | Post      | 9   | 10 | 6.635  | 0.795 |             |      |      |        |                                         |
|                                            | 3.0                  | Post      | 9   | 10 | 12.374 | 2.21  |             |      |      |        |                                         |
| Passive Tension<br>( $\text{mN mm}^{-2}$ ) | 2.2                  | Pre       | 9   | 9  | 0.107  | 0.016 | SL          | 3    | 51   | 527.67 | <b><math>2.3 \times 10^{-38}</math></b> |
|                                            | 2.4                  | Pre       | 9   | 9  | 0.277  | 0.043 |             |      |      |        |                                         |
|                                            | 2.6                  | Pre       | 9   | 9  | 0.409  | 0.039 | Treatment   | 1    | 17   | 2.84   | 0.11                                    |
|                                            | 2.8                  | Pre       | 9   | 9  | 0.805  | 0.067 |             |      |      |        |                                         |
|                                            | 3.0                  | Pre       | 9   | 9  | 1      | 0     | Interaction | 3    | 51   | 2.2    | 0.1                                     |
|                                            | 2.2                  | Post      | 9   | 10 | 0.085  | 0.012 |             |      |      |        |                                         |
|                                            | 2.4                  | Post      | 9   | 10 | 0.183  | 0.028 |             |      |      |        |                                         |
|                                            | 2.6                  | Post      | 9   | 10 | 0.324  | 0.044 |             |      |      |        |                                         |
|                                            | 2.8                  | Post      | 9   | 10 | 0.599  | 0.049 |             |      |      |        |                                         |
|                                            | 3.0                  | Post      | 9   | 10 | 1      | 0     |             |      |      |        |                                         |

Bold values indicate significant effect. SE = standard error of the mean

Supplementary Table 8. **Statistical details from experiments shown in Figure 1 k-m, and Supplementary Figure 1e.** N = number of preparations included in the condition. For SL 2.4, a total of 10 trials were run from psoas collected from 4 mice (2 female, 2 male). For SL 2.7, a total of 10 (9 post) trials were run from psoas collected from 6 animals (4 female, 2 male). For SL 3.0, a total of 10 trials were run from psoas collected from 4 animals (3 female/ 1 male).

| Parameter                                 | SL ( $\mu\text{m}$ )      | Treatment | pCa | N     | mean   | SE    | ANOVA       | df 1      | df 2 | F stat | Prob > F                    |                          |
|-------------------------------------------|---------------------------|-----------|-----|-------|--------|-------|-------------|-----------|------|--------|-----------------------------|--------------------------|
| Maximal Tension<br>(mN mm <sup>-2</sup> ) | 2.4                       | Pre       | 4.5 | 10    | 27.691 | 4.542 | SL          | 2         | 27   | 8.60   | <b>0.001</b>                |                          |
|                                           | 2.4                       | Post      | 4.5 | 10    | 26.463 | 4.498 |             |           |      |        |                             |                          |
|                                           | 2.7                       | Pre       | 4.5 | 10    | 50.745 | 6.688 | Treatment   | 1         | 26   | 0.045  | 0.83                        |                          |
|                                           | 2.7                       | Post      | 4.5 | 9     | 57.541 | 7.917 |             |           |      |        |                             |                          |
|                                           | 3.0                       | Pre       | 4.5 | 10    | 63.43  | 8.398 | Interaction | 2         | 26   | 3.802  | <b>0.036</b>                |                          |
|                                           | 3.0                       | Post      | 4.5 | 10    | 60.728 | 7.196 |             |           |      |        |                             |                          |
| Ktr<br>(s <sup>-1</sup> )                 | 2.4                       | Pre       | 4.5 | 10    | 11.248 | 0.862 | Treatment   | 1         | 79   | 76.940 | <b>2.7x10<sup>-13</sup></b> |                          |
|                                           | 2.4                       | Pre       | 5.3 | 9     | 10.283 | 0.986 |             |           |      |        |                             |                          |
|                                           | 2.4                       | Pre       | 5.4 | 10    | 9.788  | 0.842 | pCa         | 4         | 79   | 51.661 | <b>2.6x10<sup>-21</sup></b> |                          |
|                                           | 2.4                       | Pre       | 5.5 | 10    | 8.714  | 0.68  |             |           |      |        |                             |                          |
|                                           | 2.4                       | Pre       | 5.6 | 10    | 8.16   | 0.687 | Interaction | 4         | 79   | 2.0062 | 0.10                        |                          |
|                                           | 2.4                       | Pre       | 5.7 | 10    | 5.521  | 0.368 |             |           |      |        |                             |                          |
|                                           | 2.4                       | Post      | 4.5 | 10    | 11.808 | 0.762 |             |           |      |        |                             |                          |
|                                           | 2.4                       | Post      | 5.3 | 9     | 12.234 | 0.947 |             |           |      |        |                             |                          |
|                                           | 2.4                       | Post      | 5.4 | 10    | 11.621 | 0.764 |             |           |      |        |                             |                          |
|                                           | 2.4                       | Post      | 5.5 | 10    | 12.083 | 0.921 |             |           |      |        |                             |                          |
|                                           | 2.4                       | Post      | 5.6 | 10    | 11.711 | 0.762 |             |           |      |        |                             |                          |
|                                           | 2.4                       | Post      | 5.7 | 10    | 6.829  | 0.413 |             |           |      |        |                             |                          |
|                                           | Ktr<br>(s <sup>-1</sup> ) | 2.7       | Pre | 4.5   | 10     | 9.193 | 0.777       | Treatment | 1    | 75     | 22.42                       | <b>1x10<sup>-5</sup></b> |
|                                           |                           | 2.7       | Pre | 5.4   | 10     | 8.184 | 0.635       |           |      |        |                             |                          |
| 2.7                                       |                           | Pre       | 5.5 | 10    | 8.346  | 0.7   | pCa         | 4         | 74   | 120.14 | <b>9.0x10<sup>-32</sup></b> |                          |
| 2.7                                       |                           | Pre       | 5.6 | 10    | 7.81   | 0.567 |             |           |      |        |                             |                          |
| 2.7                                       |                           | Pre       | 5.7 | 9     | 5.848  | 0.559 | Interaction | 4         | 74   | 0.46   | 0.77                        |                          |
| 2.7                                       |                           | Pre       | 5.8 | 10    | 2.724  | 0.317 |             |           |      |        |                             |                          |
| 2.7                                       |                           | Post      | 4.5 | 9     | 9.516  | 0.583 |             |           |      |        |                             |                          |
| 2.7                                       |                           | Post      | 5.4 | 9     | 9.65   | 0.573 |             |           |      |        |                             |                          |
| 2.7                                       |                           | Post      | 5.5 | 9     | 9.939  | 0.67  |             |           |      |        |                             |                          |
| 2.7                                       |                           | Post      | 5.6 | 9     | 10.344 | 0.8   |             |           |      |        |                             |                          |
| Ktr<br>(s <sup>-1</sup> )                 | 2.7                       | Post      | 5.7 | 9     | 8.228  | 1.088 |             |           |      |        |                             |                          |
|                                           | 2.7                       | Post      | 5.8 | 9     | 3.315  | 0.335 |             |           |      |        |                             |                          |
|                                           | 3.0                       | Pre       | 4.5 | 10    | 7.203  | 0.563 | Treatment   | 1         | 76   | 4.27   | <b>0.042</b>                |                          |
|                                           | 3.0                       | Pre       | 5.4 | 10    | 6.483  | 0.517 |             |           |      |        |                             |                          |
|                                           | 3.0                       | Pre       | 5.5 | 10    | 6.419  | 0.554 | pCa         | 4         | 76   | 92.60  | <b>1.9x10<sup>-28</sup></b> |                          |
|                                           | 3.0                       | Pre       | 5.6 | 10    | 6.118  | 0.632 |             |           |      |        |                             |                          |
|                                           | 3.0                       | Pre       | 5.7 | 10    | 4.905  | 0.43  | Interaction | 4         | 76   | 2.76   | <b>0.034</b>                |                          |
|                                           | 3.0                       | Pre       | 5.8 | 9     | 2.751  | 0.23  |             |           |      |        |                             |                          |
|                                           | 3.0                       | Post      | 4.5 | 10    | 8.109  | 0.917 |             |           |      |        |                             |                          |
|                                           | 3.0                       | Post      | 5.4 | 10    | 7.53   | 0.691 |             |           |      |        |                             |                          |
| 3.0                                       | Post                      | 5.5       | 10  | 7.441 | 0.703  |       |             |           |      |        |                             |                          |
| 3.0                                       | Post                      | 5.6       | 10  | 7.442 | 0.73   |       |             |           |      |        |                             |                          |
| 3.0                                       | Post                      | 5.7       | 10  | 5.054 | 0.635  |       |             |           |      |        |                             |                          |
| 3.0                                       | Post                      | 5.8       | 6   | 2.639 | 0.316  |       |             |           |      |        |                             |                          |

Bold values indicate significant effect. SE = standard error of the mean

Supplementary Table 9. **Statistical details from experiments shown in Figure 2. N = number of preparations included in the condition. A total of 37 trials were run from psoas collected from 15 mice (9 male / 6 female).**

| Parameter                       | SL ( $\mu\text{m}$ ) | Treatment | N  | mean   | SE    | ANOVA       | DF <sub>1</sub> | DF <sub>2</sub> | F stat | Prob > F                                |
|---------------------------------|----------------------|-----------|----|--------|-------|-------------|-----------------|-----------------|--------|-----------------------------------------|
| $d_{10}$ (nm)                   | 2.4                  | Pre       | 36 | 39.004 | 0.363 | SL          | 2               | 162             | 58.12  | <b><math>5.4 \times 10^{-33}</math></b> |
|                                 | 2.4                  | Post      | 33 | 39.763 | 0.313 | Treatment   | 1               | 163             | 14.90  | <b><math>9.9 \times 10^{-10}</math></b> |
|                                 | 2.7                  | Pre       | 33 | 37.912 | 0.441 | Interaction | 2               | 162             | 0.08   | 0.93                                    |
|                                 | 2.7                  | Post      | 34 | 38.761 | 0.343 |             |                 |                 |        |                                         |
|                                 | 3.0                  | Pre       | 32 | 36.646 | 0.487 |             |                 |                 |        |                                         |
|                                 | 3.0                  | Post      | 34 | 37.361 | 0.426 |             |                 |                 |        |                                         |
| $\sigma_D$ ( $\text{nm}^{-1}$ ) | 2.4                  | Pre       | 21 | 7.817  | 0.253 | SL          | 2               | 109             | 31.07  | <b><math>2.1 \times 10^{-11}</math></b> |
|                                 | 2.4                  | Post      | 20 | 8.103  | 0.304 | Treatment   | 1               | 112             | 0.27   | 0.60                                    |
|                                 | 2.7                  | Pre       | 18 | 9.226  | 0.426 | Interaction | 2               | 109             | 0.23   | 0.79                                    |
|                                 | 2.7                  | Post      | 18 | 8.902  | 0.424 |             |                 |                 |        |                                         |
|                                 | 3.0                  | Pre       | 15 | 10.293 | 0.603 |             |                 |                 |        |                                         |
|                                 | 3.0                  | Post      | 21 | 10.616 | 0.524 |             |                 |                 |        |                                         |
| $S_{T3}$ (nm)                   | 2.4                  | Pre       | 33 | 12.644 | 0.007 | SL          | 2               | 144             | 7.48   | <b><math>8.0 \times 10^{-4}</math></b>  |
|                                 | 2.4                  | Post      | 29 | 12.631 | 0.007 | Treatment   | 1               | 147             | 13.73  | <b><math>3.0 \times 10^{-4}</math></b>  |
|                                 | 2.7                  | Pre       | 29 | 12.650 | 0.007 | Interaction | 2               | 144             | 0.03   | 0.97                                    |
|                                 | 2.7                  | Post      | 31 | 12.638 | 0.009 |             |                 |                 |        |                                         |
|                                 | 3.0                  | Pre       | 29 | 12.659 | 0.007 |             |                 |                 |        |                                         |
|                                 | 3.0                  | Post      | 32 | 12.647 | 0.007 |             |                 |                 |        |                                         |
| $S_{A6}$ (nm)                   | 2.4                  | Pre       | 32 | 5.818  | 0.005 | SL          | 2               | 134             | 54.02  | <b><math>6.3 \times 10^{-18}</math></b> |
|                                 | 2.4                  | Post      | 24 | 5.804  | 0.005 | Treatment   | 1               | 136             | 36.81  | <b><math>1.2 \times 10^{-8}</math></b>  |
|                                 | 2.7                  | Pre       | 30 | 5.841  | 0.005 | Interaction | 2               | 134             | 1.12   | 0.33                                    |
|                                 | 2.7                  | Post      | 27 | 5.826  | 0.005 |             |                 |                 |        |                                         |
|                                 | 3.0                  | Pre       | 29 | 5.845  | 0.005 |             |                 |                 |        |                                         |
|                                 | 3.0                  | Post      | 29 | 5.835  | 0.005 |             |                 |                 |        |                                         |
| $S_{A7}$ (nm)                   | 2.4                  | Pre       | 28 | 5.062  | 0.003 | SL          | 2               | 110             | 26.01  | <b><math>5.7 \times 10^{-10}</math></b> |
|                                 | 2.4                  | Post      | 23 | 5.046  | 0.004 | Treatment   | 1               | 113             | 15.42  | <b><math>1.4 \times 10^{-4}</math></b>  |
|                                 | 2.7                  | Pre       | 22 | 5.071  | 0.004 | Interaction | 2               | 109             | 2.35   | 0.10                                    |
|                                 | 2.7                  | Post      | 20 | 5.060  | 0.004 |             |                 |                 |        |                                         |
|                                 | 3.0                  | Pre       | 26 | 5.076  | 0.003 |             |                 |                 |        |                                         |
|                                 | 3.0                  | Post      | 23 | 5.073  | 0.004 |             |                 |                 |        |                                         |
| $S_{gActin}$ (nm)               | 2.4                  | Pre       | 28 | 2.708  | 0.002 | SL          | 2               | 99              | 65.67  | <b><math>7.1 \times 10^{-19}</math></b> |
|                                 | 2.4                  | Post      | 20 | 2.699  | 0.002 | Treatment   | 1               | 101             | 46.77  | <b><math>6.2 \times 10^{-10}</math></b> |
|                                 | 2.7                  | Pre       | 22 | 2.715  | 0.002 | Interaction | 2               | 99              | 3.62   | <b>0.03</b>                             |
|                                 | 2.7                  | Post      | 17 | 2.709  | 0.002 |             |                 |                 |        |                                         |
|                                 | 3.0                  | Pre       | 24 | 2.718  | 0.002 |             |                 |                 |        |                                         |
|                                 | 3.0                  | Post      | 22 | 2.715  | 0.002 |             |                 |                 |        |                                         |

**Bold values indicate significant effect. SE = standard error of the mean**

Supplementary Table 10. **Statistical details from experiments shown in Figure 3. N = number of preparations included in the condition. A total of 37 trials were run from psoas collected from 15 mice (9 male /6 female).**

| Parameter                        | SL ( $\mu\text{m}$ ) | Treatment | N  | mean   | SE    | ANOVA       | DF <sub>1</sub> | DF <sub>2</sub> | F stat | Prob > F                    |
|----------------------------------|----------------------|-----------|----|--------|-------|-------------|-----------------|-----------------|--------|-----------------------------|
| I <sub>M2</sub> cluster          | 2.4                  | Pre       | 28 | 0.371  | 0.036 | SL          | 2               | 129             | 4.05   | <b>0.02</b>                 |
|                                  | 2.4                  | Post      | 28 | 0.206  | 0.022 | Treatment   | 1               | 135             | 26.60  | <b>8.7x10<sup>-7</sup></b>  |
|                                  | 2.7                  | Pre       | 24 | 0.292  | 0.035 | Interaction | 2               | 129             | 4.91   | <b>0.01</b>                 |
|                                  | 2.7                  | Post      | 27 | 0.216  | 0.019 |             |                 |                 |        |                             |
|                                  | 3.0                  | Pre       | 28 | 0.242  | 0.021 |             |                 |                 |        |                             |
|                                  | 3.0                  | Post      | 28 | 0.211  | 0.022 |             |                 |                 |        |                             |
| I <sub>11</sub> /I <sub>10</sub> | 2.4                  | Pre       | 35 | 0.636  | 0.029 | SL          | 2               | 157             | 4.67   | <b>0.01</b>                 |
|                                  | 2.4                  | Post      | 31 | 0.749  | 0.028 | Treatment   | 1               | 159             | 19.42  | <b>3.0x10<sup>-8</sup></b>  |
|                                  | 2.7                  | Pre       | 32 | 0.726  | 0.042 | Interaction | 2               | 157             | 0.35   | 0.71                        |
|                                  | 2.7                  | Post      | 34 | 0.827  | 0.035 |             |                 |                 |        |                             |
|                                  | 3.0                  | Pre       | 30 | 0.708  | 0.043 |             |                 |                 |        |                             |
|                                  | 3.0                  | Post      | 33 | 0.860  | 0.053 |             |                 |                 |        |                             |
| S <sub>M3</sub> (nm)             | 2.4                  | Pre       | 32 | 14.184 | 0.008 | SL          | 2               | 146             | 36.34  | <b>1.6x10<sup>-13</sup></b> |
|                                  | 2.4                  | Post      | 28 | 14.223 | 0.007 | Treatment   | 1               | 147             | 18.24  | <b>3.0x10<sup>-5</sup></b>  |
|                                  | 2.7                  | Pre       | 31 | 14.231 | 0.009 | Interaction | 2               | 143             | 2.39   | <b>0.09</b>                 |
|                                  | 2.7                  | Post      | 31 | 14.264 | 0.009 |             |                 |                 |        |                             |
|                                  | 3.0                  | Pre       | 31 | 14.259 | 0.009 |             |                 |                 |        |                             |
|                                  | 3.0                  | Post      | 31 | 14.266 | 0.010 |             |                 |                 |        |                             |
| S <sub>M6</sub> (nm)             | 2.4                  | Pre       | 31 | 7.163  | 0.002 | SL          | 2               | 134             | 30.07  | <b>1.6x10<sup>-11</sup></b> |
|                                  | 2.4                  | Post      | 26 | 7.169  | 0.002 | Treatment   | 1               | 137             | 12.75  | <b>5.0x10<sup>-4</sup></b>  |
|                                  | 2.7                  | Pre       | 29 | 7.171  | 0.002 | Interaction | 2               | 134             | 0.12   | 0.89                        |
|                                  | 2.7                  | Post      | 29 | 7.176  | 0.003 |             |                 |                 |        |                             |
|                                  | 3.0                  | Pre       | 28 | 7.176  | 0.003 |             |                 |                 |        |                             |
|                                  | 3.0                  | Post      | 27 | 7.180  | 0.003 |             |                 |                 |        |                             |

Bold values indicate significant effect. SE = standard error of the mean

Supplementary Table 11. **Statistical details from experiments shown in Supplementary Figure 2 (controls). N = number of preparations included in the condition. A total of 20 trials were run from psoas collected from 6 mice (3 male / 3 female).**

| Parameter                        | SL ( $\mu\text{m}$ ) | Treatment | N  | mean   | SE    | ANOVA       | DF <sub>1</sub> | DF <sub>2</sub> | F stat | Prob > F                    |
|----------------------------------|----------------------|-----------|----|--------|-------|-------------|-----------------|-----------------|--------|-----------------------------|
| d <sub>10</sub> (nm)             | 2.4                  | Pre       | 19 | 39.54  | 0.32  | Treatment   | 1               | 37              | 0.79   | 0.40                        |
|                                  | 2.4                  | Post      | 8  | 39.34  | 0.46  | SL          | 1               | 33              | 46.08  | <b>1.0 x10<sup>-7</sup></b> |
|                                  | 2.7                  | Pre       | 19 | 37.40  | 0.44  | Interaction | 1               | 33              | 0.04   | 0.84                        |
|                                  | 2.7                  | Post      | 8  | 37.32  | 0.62  |             |                 |                 |        |                             |
| I <sub>11</sub> /I <sub>10</sub> | 2.4                  | Pre       | 19 | 0.504  | 0.049 | Treatment   | 1               | 37              | 0.18   | 0.68                        |
|                                  | 2.4                  | Post      | 8  | 0.501  | 0.073 | SL          | 1               | 32              | 10.40  | <b>0.003</b>                |
|                                  | 2.7                  | Pre       | 19 | 0.634  | 0.058 | Interaction | 1               | 32              | 0.04   | 0.84                        |
|                                  | 2.7                  | Post      | 8  | 0.642  | 0.088 |             |                 |                 |        |                             |
| $\sigma_D$ (nm <sup>-1</sup> )   | 2.4                  | Pre       | 17 | 98.854 | 0.214 | Treatment   | 1               | 45              | 0.24   | 0.62                        |
|                                  | 2.4                  | Post      | 7  | 8.793  | 0.284 | SL          | 1               | 28              | 21.35  | <b>7.8 x10<sup>-5</sup></b> |
|                                  | 2.7                  | Pre       | 17 | 10.098 | 0.236 | Interaction | 1               | 26              | 0.00   | 0.95                        |
|                                  | 2.7                  | Post      | 8  | 9.996  | 0.276 |             |                 |                 |        |                             |
| S <sub>M3</sub> (nm)             | 2.4                  | Pre       | 17 | 14.185 | 0.015 | Treatment   | 1               | 37              | 0.02   | 0.88                        |
|                                  | 2.4                  | Post      | 10 | 14.202 | 0.022 | SL          | 1               | 33              | 29.94  | <b>4.6x10<sup>-6</sup></b>  |
|                                  | 2.7                  | Pre       | 19 | 14.247 | 0.015 | Interaction | 1               | 33              | 0.08   | 0.77                        |
|                                  | 2.7                  | Post      | 10 | 14.271 | 0.022 |             |                 |                 |        |                             |
| S <sub>M6</sub> (nm)             | 2.4                  | Pre       | 13 | 7.150  | 0.005 | Treatment   | 1               | 21              | 0.37   | 0.55                        |
|                                  | 2.4                  | Post      | 4  | 7.152  | 0.010 | SL          | 1               | 17              | 20.43  | <b>3.0x10<sup>-4</sup></b>  |
|                                  | 2.7                  | Pre       | 13 | 7.161  | 0.081 | Interaction | 1               | 17              | 0.18   | 0.67                        |
|                                  | 2.7                  | Post      | 4  | 7.179  | 0.016 |             |                 |                 |        |                             |
| S <sub>T3</sub> (nm)             | 2.4                  | Pre       | 16 | 12.608 | 0.012 | Treatment   | 1               | 32              | 0.30   | 0.59                        |
|                                  | 2.4                  | Post      | 8  | 12.617 | 0.021 | SL          | 1               | 26              | 26.98  | <b>2.0x10<sup>-5</sup></b>  |
|                                  | 2.7                  | Pre       | 16 | 12.652 | 0.010 | Interaction | 1               | 26              | 0.01   | 0.91                        |
|                                  | 2.7                  | Post      | 7  | 12.671 | 0.021 |             |                 |                 |        |                             |
| S <sub>A6</sub> (nm)             | 2.4                  | Pre       | 15 | 5.808  | 0.008 | Treatment   | 1               | 28              | 1.46   | 0.24                        |
|                                  | 2.4                  | Post      | 8  | 5.817  | 0.010 | SL          | 1               | 26              | 55.07  | <b>7.0x10<sup>-8</sup></b>  |
|                                  | 2.7                  | Pre       | 16 | 5.847  | 0.011 | Interaction | 1               | 26              | 0.22   | 0.64                        |
|                                  | 2.7                  | Post      | 8  | 5.856  | 0.011 |             |                 |                 |        |                             |
| S <sub>A7</sub> (nm)             | 2.4                  | Pre       | 6  | 5.060  | 0.007 | Treatment   | 1               | 17              | 0.16   | 0.70                        |
|                                  | 2.4                  | Post      | 5  | 5.063  | 0.010 | SL          | 1               | 11              | 6.24   | <b>0.03</b>                 |
|                                  | 2.7                  | Pre       | 8  | 5.079  | 0.011 | Interaction | 1               | 10              | 0.12   | 0.74                        |
|                                  | 2.7                  | Post      | 3  | 5.073  | 0.011 |             |                 |                 |        |                             |
| S <sub>gActin</sub> (nm)         | 2.4                  | Pre       | 6  | 2.707  | 0.006 | Treatment   | 1               | 14              | 0.56   | 0.46                        |
|                                  | 2.4                  | Post      | 5  | 2.708  | 0.006 | SL          | 1               | 9               | 10.59  | <b>0.009</b>                |
|                                  | 2.7                  | Pre       | 8  | 2.719  | 0.005 | Interaction | 1               | 9               | 0.10   | 0.76                        |
|                                  | 2.7                  | Post      | 3  | 2.719  | 0.006 |             |                 |                 |        |                             |

Bold values indicate significant effect. SE = standard error of the mean

Supplementary Table 12. **Statistical details between control and SnoopC2 X-ray study datasets. Connecting letters report = matching letters between conditions are not significantly different.**

| Parameter                          | ANOVA       | DF <sub>1</sub> | DF <sub>2</sub> | F stat | Prob > F                    | Study   | SL (μm) | Connecting Letters |
|------------------------------------|-------------|-----------------|-----------------|--------|-----------------------------|---------|---------|--------------------|
| d <sub>10</sub> (nm)               | Study       | 1               | 53              | 0.0002 | 0.99                        | Control | 2.4     | A, B               |
|                                    | SL          | 1               | 50              | 46.08  | <b>1.0x10<sup>-8</sup></b>  | TEV     | 2.4     | A, C               |
|                                    | Interaction | 1               | 50              | 0.04   | <b>0.02</b>                 | Control | 2.7     | C, D               |
|                                    |             |                 |                 |        |                             | TEV     | 2.7     | B, D               |
| I <sub>11</sub> /I <sub>10</sub>   | Study       | 1               | 51              | 3.23   | 0.08                        | Control | 2.4     | A                  |
|                                    | SL          | 1               | 49              | 16.73  | <b>1.6x10<sup>-4</sup></b>  | TEV     | 2.4     | A                  |
|                                    | Interaction | 1               | 49              | 0.19   | 0.66                        | Control | 2.7     | B                  |
|                                    |             |                 |                 |        |                             | TEV     | 2.7     | B                  |
| σ <sub>D</sub> (nm <sup>-1</sup> ) | Study       | 1               | 37              | 7.96   | <b>0.01</b>                 | Control | 2.4     | A                  |
|                                    | SL          | 1               | 35              | 28.70  | <b>5.4x10<sup>-6</sup></b>  | TEV     | 2.4     | B                  |
|                                    | Interaction | 1               | 35              | 0.08   | 0.78                        | Control | 2.7     | C                  |
|                                    |             |                 |                 |        |                             | TEV     | 2.7     | D                  |
| S <sub>M3</sub> (nm)               | Study       | 1               | 48              | 0.87   | 0.36                        | Control | 2.4     | A                  |
|                                    | SL          | 1               | 43              | 39.67  | <b>1.3x10<sup>-7</sup></b>  | TEV     | 2.4     | A                  |
|                                    | Interaction | 1               | 43              | 0.44   | 0.51                        | Control | 2.7     | B                  |
|                                    |             |                 |                 |        |                             | TEV     | 2.7     | B                  |
| S <sub>M6</sub> (nm)               | Study       | 1               | 45              | 0.18   | 0.67                        | Control | 2.4     | A                  |
|                                    | SL          | 1               | 38              | 61.58  | <b>1.8 x10<sup>-9</sup></b> | TEV     | 2.4     | A                  |
|                                    | Interaction | 1               | 38              | 16.40  | <b>2.0x10<sup>-4</sup></b>  | Control | 2.7     | B                  |
|                                    |             |                 |                 |        |                             | TEV     | 2.7     | B                  |
| S <sub>T3</sub> (nm)               | Study       | 1               | 46              | 1.81   | 0.18                        | Control | 2.4     | A                  |
|                                    | SL          | 1               | 41              | 20.01  | <b>6.0x10<sup>-5</sup></b>  | TEV     | 2.4     | B                  |
|                                    | Interaction | 1               | 41              | 11.49  | <b>0.002</b>                | Control | 2.7     | B                  |
|                                    |             |                 |                 |        |                             | TEV     | 2.7     | B                  |
| S <sub>A6</sub> (nm)               | Study       | 1               | 46              | 0.01   | 0.92                        | Control | 2.4     | A                  |
|                                    | SL          | 1               | 42              | 75.60  | <b>6.8x10<sup>-11</sup></b> | TEV     | 2.4     | A                  |
|                                    | Interaction | 1               | 42              | 3.55   | 0.07                        | Control | 2.7     | B                  |
|                                    |             |                 |                 |        |                             | TEV     | 2.7     | B                  |
| S <sub>A7</sub> (nm)               | Study       | 1               | 37              | 0.21   | 0.65                        | Control | 2.4     | A                  |
|                                    | SL          | 1               | 29              | 16.31  | <b>4.0x10<sup>-4</sup></b>  | TEV     | 2.4     | A                  |
|                                    | Interaction | 1               | 29              | 0.27   | 0.61                        | Control | 2.7     | B                  |
|                                    |             |                 |                 |        |                             | TEV     | 2.7     | B                  |
| S <sub>gActin</sub> (nm)           | Study       | 1               | 37              | 0.20   | 0.66                        | Control | 2.4     | A                  |
|                                    | SL          | 1               | 26              | 49.81  | <b>1.7x10<sup>-7</sup></b>  | TEV     | 2.4     | A                  |
|                                    | Interaction | 1               | 26              | 0.12   | 0.74                        | Control | 2.7     | B                  |
|                                    |             |                 |                 |        |                             | TEV     | 2.7     | B                  |

Bold values indicate significant effect. SE = standard error of the mean
